# Supplementary material for: ERAD‐dependent control of the Wnt secretory factor Evi
Source: PubMed Central journal article supplement (PMC5813261; doi:10.15252/embj.201797311), 2018-01-29

Fig5 A Flag IP

Fig5 A Input

Fig5 B GFP IP

Fig5 B Input

|                      | siVCP |   |   |   |   |   |   |   |
|----------------------|-------|---|---|---|---|---|---|---|
|                      | +     | - | - | + | - | - | - | - |
| empty                | +     | - | - | + | - | - | - | - |
| Porcn-FLAG           | -     | + | + | - | + | + | + | - |
| Wnt3A                | +     | + | - | + | + | - | - | - |
| IGFBP5-V5            | -     | - | + | - | - | + | + | - |
| Evi <sup>KO2.9</sup> | -     | - | - | - | - | - | - | + |

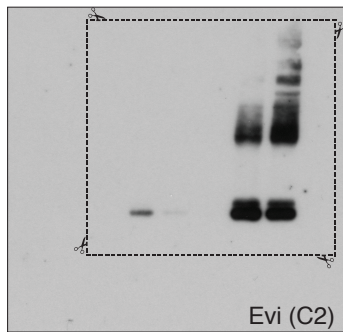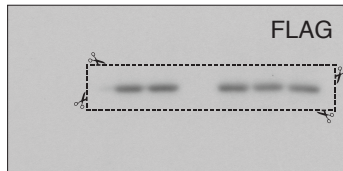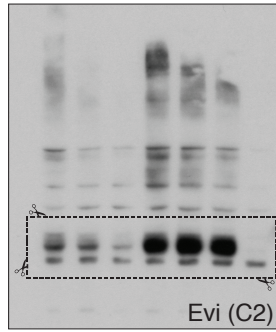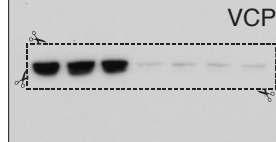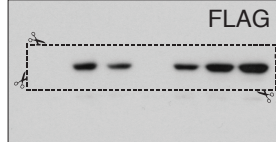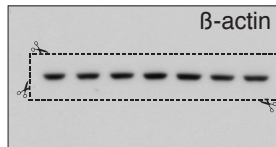

|                      | siVCP |   |   |   |   |   |   |   |   |   |
|----------------------|-------|---|---|---|---|---|---|---|---|---|
|                      | +     | - | - | + | - | - | - | - | - | - |
| VCP-GFP              | -     | - | + | + | - | - | - | - | - | - |
| VCP-DKO GFP+         | -     | - | - | - | + | + | - | - | + | + |
| Wnt3A                | +     | + | - | + | - | - | + | + | - | + |
| IGFBP5-V5            | -     | - | + | - | + | - | - | - | + | - |
| Evi <sup>KO2.9</sup> | +     | - | - | - | - | - | - | + | - | - |
| NMS873               | -     | + | - | - | - | - | - | - | + | - |

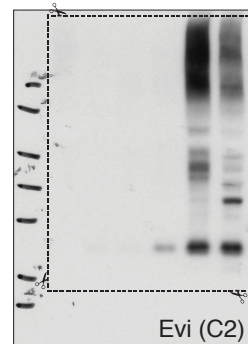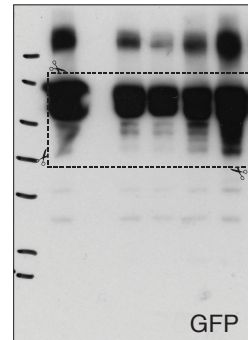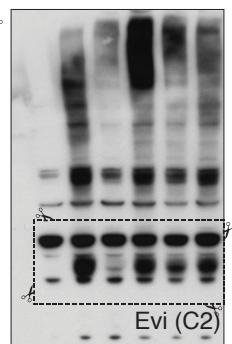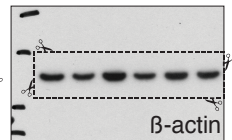

# Fig5 C IPs

# Fig5 C Input

|             | Double IP |   |   |   |   | FLAG IP |   |   |   |   |   |   |   |   |   |
|-------------|-----------|---|---|---|---|---------|---|---|---|---|---|---|---|---|---|
| Porcn-FLAG  | +         | + | + | - | + | +       | + | + | - | + | + | + | + | - | + |
| VCP-GFP DKO | +         | + | + | + | - | +       | + | + | + | - | + | + | + | + | - |
| Wnt3A       | -         | - | + | - | - | -       | - | + | - | - | - | - | + | - | - |
| EviKO       | +         | - | - | - | - | +       | - | - | - | - | + | - | - | - | - |
| NMS873      | -         | - | - | - | + | -       | - | - | - | + | - | - | - | - | + |

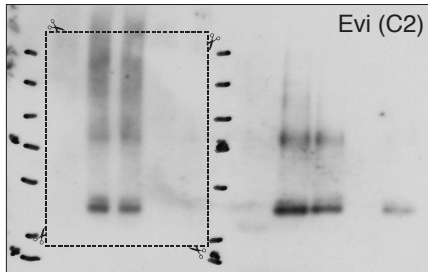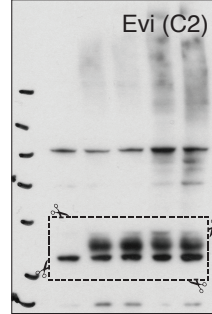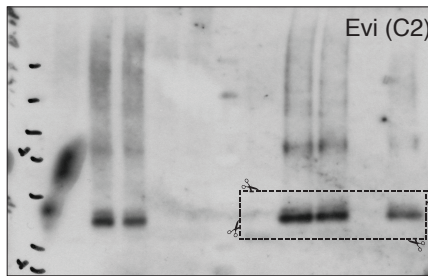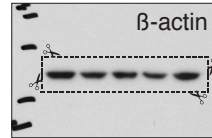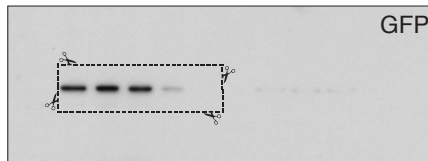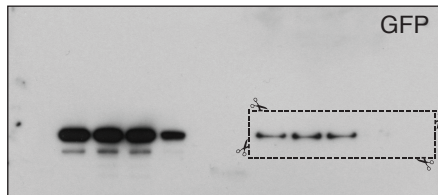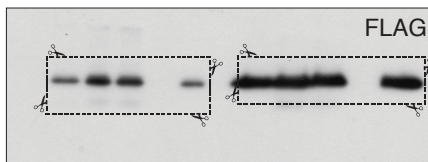

Supplement: EMBJ-37-e97311-s007.pdf [file EMBJ-37-e97311-s007.pdf]
