# Supplementary material for: ERAD‐dependent control of the Wnt secretory factor Evi
Source: PubMed Central journal article supplement (PMC5813261; doi:10.15252/embj.201797311), 2018-01-29
Supplement: EMBJ-37-e97311-s001.pdf [file EMBJ-37-e97311-s001.pdf]

# **APPENDIX**

## **TABLE OF CONTENT**

Figure S1

Figure S2

Figure S3

Figure S4

Table S1

Table S2

Legends for Appendix Figures and Tables

**A**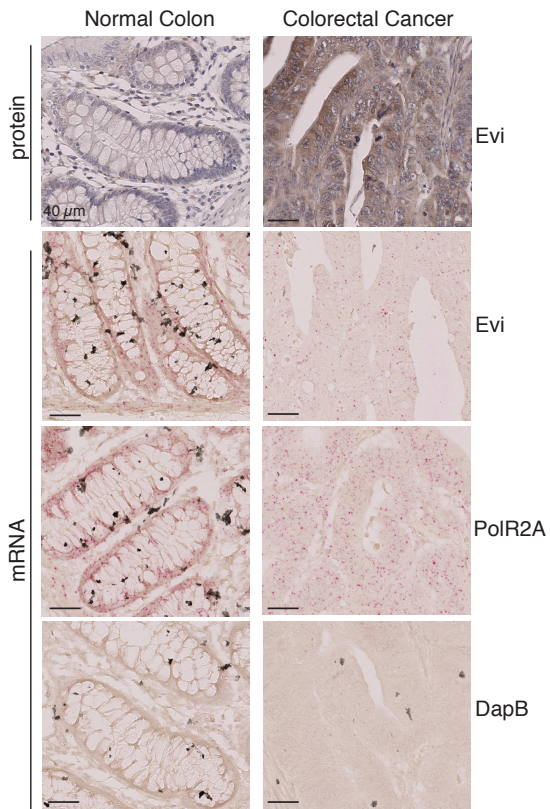**B**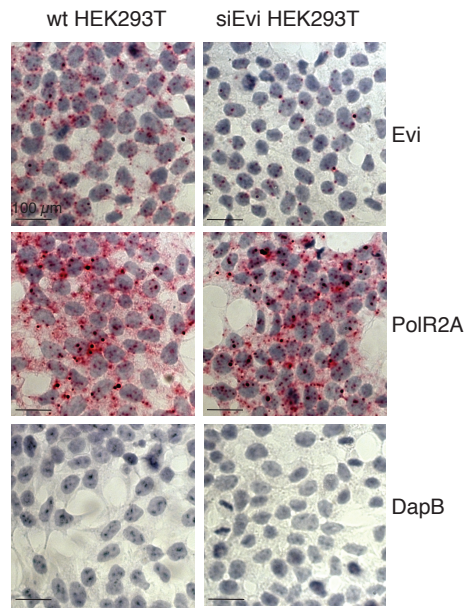

Appendix Figure S1

**sgEvi2 #9**

Exon 3

|                      |                                                    |     |
|----------------------|----------------------------------------------------|-----|
| Evi <sup>WT</sup>    | AGTCT <b>CCA</b> TGGACGTTTCCCTGGCTTACCGTGATGACGCGT | wt  |
| Evi <sup>KO2.9</sup> | AGTCTCCATGGA-GTTTCCCTGGCTTACCGTGATGACGCGT          | -1  |
|                      | AGTCTCCATG-----ACGCGT                              | -25 |
|                      | AGTCTCCAT--ACGTTTCCCTGGCTTACCGTGATGACGCGT          | -2  |

**sgEvi1 #1**

Exon 2

Intron 2

|                      |                                                       |                 |
|----------------------|-------------------------------------------------------|-----------------|
| Evi <sup>WT</sup>    | TAAACA <b>CCA</b> AAT-CAGTTAAGTGTACTCTCCTCTCATCCCTTT  | wt              |
| Evi <sup>KO1.1</sup> | TAAACAACCAAAT-----GTACTCTCCTCTCATCCCTTT               | -9 (-2 in Exon) |
|                      | TAAACAACCAA--CAGTTAAGTGTACTCTCCTCTCATCCCTTT           | -2              |
|                      | TAAACAACCAAAT <b>G</b> CAGTTAAGTGTACTCTCCTCTCATCCCTTT | +1              |
|                      | TAAACAACCAAAT----TTAAGTGTACTCTCCTCTCATCCCTTT          | -3 (-2 in Exon) |
|                      | TAAACAACCAAAA-----TTAAGTGTACTCTCCTCTCATCCCTTT         | -4 (-3 in Exon) |

**sgPorcn1 #2**

Exon 2

|                        |                                               |     |
|------------------------|-----------------------------------------------|-----|
| Porcn <sup>WT</sup>    | TCCTGCCTACTGCCCAGCAGGGCCTTGACCAGATCTGGCTGCTCC | wt  |
| Porcn <sup>KO1.2</sup> | TCCTGCCTACT-----CCAGATCTGGCTGCTCC             | -17 |

**sgPorcn1 #4**

Exon 2

|                        |                                               |    |
|------------------------|-----------------------------------------------|----|
| Porcn <sup>WT</sup>    | TCCTGCCTACTGCCCAGCAGGGCCTTGACCAGATCTGGCTGCTCC | wt |
| Porcn <sup>KO1.4</sup> | TCCTGCCTACTGCCCAGCAGGGCCTT--CCAGATCTGGCTGCTCC | -2 |
|                        | TCCTGCCTACTGCCCAGCAGGGCCTT----GATCTGGCTGCTCC  | -5 |
|                        | TCCTGCCTACTGCCCAGCAGGGCCTTG-CCAGATCTGGCTGCTCC | -1 |
|                        | TCCTGCCTACTGCCCAGCAGGGCCTTG-CCGATCTGGCTGCTCC  | -1 |



**A**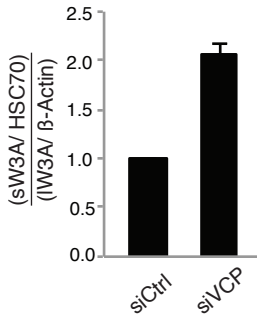**B**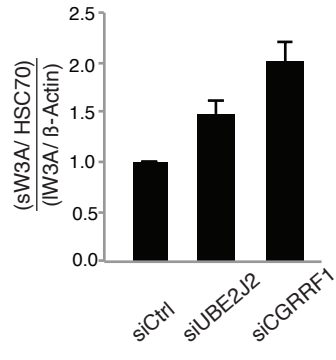

## Appendix Table S1: Oligonucleotide sequences

### qRT-PCR Primer

| Primer name | Roche Probe | Sequence (5'→ 3')      |
|-------------|-------------|------------------------|
| EVI_fwd     | #60         | ATGGAGAAGACCAGTCCAATG  |
| EVI_rev     | #60         | GATAGTGGTGGTGAGCTGGAG  |
| VCP_fwd     | #35         | AGAGGCAGACAAACCCATCA   |
| VCP_rev     | #35         | AGTGATCTCGACGGATCTCAG  |
| AXIN2_fwd   | #88         | AGAGCAGCTCAGCAAAAAGG   |
| AXIN2_rev   | #88         | CCTTCATACATCGGGAGCAC   |
| GAPDH_fwd   | #60         | AGCCACATCGCTCAGACAC    |
| GAPDH_rev   | #60         | GCCCAATACGACCAAATCC    |
| GP78_fwd    | #69         | GTGCAGCGTAAGGACGAACT   |
| GP78_rev    | #69         | AGAGGACGCACCTTCCAA     |
| TRC8_fwd    | #50         | caaagccggttctgcatc     |
| TRC8_rev    | #50         | actggatgcaaatacaccaaag |
| CGRRF1_fwd  | #46         | gggctctaccagagcaag     |
| CGRRF1_rev  | #46         | agaaaagcggcgagtattca   |
| RNF5_fwd    | #78         | atgccccatgagcctttcc    |
| RNF5_rev    | #78         | cgagaaacaggaagagggaaat |
| MARCH6_fwd  | #88         | ggaggaagatgacgctggt    |
| MARCH6_rev  | #88         | gcattccaattcatgcatcc   |
| RNF170_fwd  | #62         | aacagctcaaacagaaacagga |
| RNF170_rev  | #62         | tgtcagtgtagaactgctgctg |
| HRD1_fwd    | #79         | tgaggaccgtgtggacttta   |
| HRD1_rev    | #79         | gacgaagaggaagtccaggat  |
| RNF128_fwd  | #86         | ggaacacgtgcagtcacaaca  |
| RNF128_rev  | #86         | tgggttgtaacatgaggaa    |
| UBE2J1_fwd  | #73         | tgctacggccagtacatcg    |
| UBE2J1_rev  | #73         | acaggttgggtaggtgatga   |
| UBE2J2_fwd  | #22         | tcctgactgggctcctga     |
| UBE2J2_rev  | #22         | tgactgcccagttgtctttt   |

### guide RNA

|         |                      |
|---------|----------------------|
| sgEVI2  | TGGACGTTTCCCTGGCTTAC |
| sgEVI1  | AATCAGTTAAGTGTACTCTC |
| sgPORCN | TGACCAGATCTGGCTGCTCC |

### Amplicon Sequencing Primer

|                      |                                                 |
|----------------------|-------------------------------------------------|
| <b>for First PCR</b> | <i>Adapter sequence; Gene specific sequence</i> |
| sgEVI_ex3_fwd        | TCCCTACACGACGctcttccgatctGCGATCTGGGTGTCCATAGT   |
| sgEVI_ex3_rev        | AGTTCAGACGTGTGctcttccgatctAGCTACCGTCAGAAGGCAAA  |
| sgEVI_ex2_fwd        | TCCCTACACGACGctcttccgatctATGCCCGTAAGAACCATCAC   |
| sgEVI_ex2_rev        | AGTTCAGACGTGTGctcttccgatctGGGAAGAAAGGGATGAGAGG  |

|                       |                                                                             |
|-----------------------|-----------------------------------------------------------------------------|
| sgPORCN_fwd1          | TCCCTACACGACGctcttccgatctCTCTGTGTCCCTGCTTTGAC                               |
| sgPORCN_rev1          | AGTTCAGACGTGTGctcttccgatctTGTGGGAGGTCTGATATGGC                              |
| sgPORCN_fwd2          | TCCCTACACGACGctcttccgatctGTCCCTGCTTTGACAGATCT                               |
| sgPORCN_rev2          | AGTTCAGACGTGTGctcttccgatctGGAGGTCTGATATGGCCTGG                              |
| <b>for Second PCR</b> | <i>Library specific barcode</i>                                             |
| Sq_Lib_fwd            | AATGATACGGCGACCACCGAGATCTACAC-XXXXXXXX-<br>ACACTCTTCCCTACACGACGCTCTTCCGATCT |
| Sq_Lib_rev            | CAAGCAGAAGACGGCATAACGAGAT-XXXXXXXX-<br>GTGACTGGAGTTCAGACGTGTGCTCTTCCGATC    |

### Cloning Primer

|                  |                                                                               |
|------------------|-------------------------------------------------------------------------------|
| UBE2J2-V5_rev    | GGATAGGCTTACCTTCGAAGGCCTCCTGCGCGATGCTCCTCAGCAC                                |
| UBE2J2-V5_fwd    | TATAGGGAGACCCAAGCTTGGTACGATGAGCAGCACCAGCAGTAAGAGG<br>GCTCC                    |
| Wnt3A-KDEL_fwd   | CGTGACACCTGCAAGAAAGATGAGTTGTGAGGGCGCGCCG ACCAGC                               |
| Wnt3A-KDEL_rev   | GCTGGTCGGCGCGCCCTCACAACTCATCTTCTTGCAGGTGTGCACG                                |
| CGRRF1-C2/3A_fwd | CTGTGTTGTTGCCAGAATGGGACTGTGAACTGGTACTCTTACCAGCCA<br>GACACACATGC               |
| CGRRF1-C2/3A_rev | GCATGTGTGTCTGGCTGGTAAGAGTACCCAGTTCACAGTCCCATTCTGGG<br>CAACAACACAG             |
| CGRRF1-C2/4A_fwd | GACTGTGTTGTTGCCAGAATGGGACTGTGAACTGGTACTCTTACCATG<br>CAGACACACAGCCCTGTGTGATG   |
| CGRRF1-C2/4A_rev | CATCACACAGGGCTGTGTGTCTGCATGGTAAGAGTACCCAGTTCACAGTC<br>CCATTCTGGGCAACAACACAGTC |

**Appendix Table S2: siRNAs**

| <b>Gene Name</b>        | <b>Dharmacon Cat No.</b> | <b>Target Sequence</b> |
|-------------------------|--------------------------|------------------------|
| siCtrl non-targeting#1  | D-001210-01              | UAGCGACUAAACACAUCA     |
| siCtrl non-targeting#2  | D-001210-02              | UAAGGCUAUGAAGAGAUAC    |
| siCtrl non-targeting#3  | D-001210-03              | AUGUAUUGGCCUGUAUUAG    |
| siCtrl non-targeting#4  | D-001210-04              | AUGAACGUGAAUUGCUCAA    |
| siUBC#1                 | D-019408-01              | GUGAAGACCCUGACUGGUA    |
| siUBC#2                 | D-019408-02              | AAGCAAAGAUCCAGGACAA    |
| siUBC#3                 | D-019408-03              | GAAGAUGGACGCACCCUGU    |
| siUBC#4                 | D-019408-04              | GUAAGACCAUCACUCUCGA    |
| siUBE2J2#1              | D-008614-01              | GAAGGUGGCUAUUAUCAUG    |
| siUBE2J2#2              | D-008614-02              | GCACAAGACGAACUCAGUA    |
| siUBE2J2#4              | D-008614-04              | GUUAGAGACGUCGGACUU     |
| siUBE2J2#18             | D-008614-18              | CCCAGUAUCUAUAUGAUCA    |
| siUBE2G2#1              | D-009095-01              | UCUAUAAGAUUGCCAAGCA    |
| siUBE2G2#2              | D-009095-02              | GAUGGGAGAGUCUGCAUUU    |
| siUBE2G2#3              | D-009095-03              | CCACUUGAUUACCCGUUAA    |
| siUBE2G2#5              | D-009095-05              | GAGCUAACGUGGAUGCGUC    |
| siUBE2J1#1              | D-007266-01              | GAAAGAAGCGGCAGAAUUG    |
| siUBE2J1#3              | D-007266-03              | GAAUAUAUCUGGCAAACGA    |
| siUBE2J1#19             | D-007266-19              | GGAAGUAUAUGUAAGGUUA    |
| siUBE2J1#20             | D-007266-20              | GGCUAAUGGUCGAUUUGAA    |
| siUBE2U#1               | D-008998-01              | GAAGUGGAAUACAACUAU     |
| siUBE2U#2               | D-008998-02              | GAAUACUGGUUAAAGAUGA    |
| siUBE2U#3               | D-008998-03              | GUGAAGUAUGAUGGAAUG     |
| siUBE2U#4               | D-008998-04              | CAACCUCAUUUAGUGAUUA    |
| siCGRRF1#1              | D-006933-01              | GAAGAUAGCCUCCUUACAU    |
| siCGRRF1#2              | D-006933-02              | GACCUUAGCUGAUGAGGAU    |
| siCGRRF1#3              | D-006933-03              | UAUGAAUACUCGCCGCUUU    |
| siCGRRF1#4              | D-006933-04              | CUACAUCGCGGUGGUCUUU    |
| siMARCH4#2              | D-023172-02              | CAUCACCACUGUGCUUAUA    |
| siMARCH4#3              | D-023172-03              | GAGCUGGUCAUGAGAGUCA    |
| siMARCH4#5              | D-023172-05              | GUACUGCUAUGGAUUUGUGU   |
| siMARCH4#6              | D-023172-06              | GAGGAUCGCUACUCACUGG    |
| siRNF128#1              | D-007061-01              | GAAUUGAGGUGGAUGUUGA    |
| siRNF128#4              | D-007061-04              | CAAAGAGGCAUACAAGUGA    |
| siRNF128#17             | D-007061-17              | GGUCAUUGAUCUUCGUUCA    |
| siRNF128#18             | D-007061-18              | GAGACUGCUGUUCGAGAAA    |
| siRNF5#1                | D-006558-01              | CGGCAAGAGUGUCCAGUAU    |
| siRNF5#2                | D-006558-02              | GCUGGGAUCAGCAGAGAGA    |
| siRNF5#3                | D-006558-03              | GCAAGAGUGUCCAGUAUGU    |
| siRNF5#18               | D-006558-18              | CCGAAGGGCCAAAUCGCGA    |
| siSYVN1#1 (siHRD1#1)    | D-007090-01              | CAACAAGGCUGUGUACAUG    |
| siSYVN1#2 (siHRD1#2)    | D-007090-02              | UGUCUGGCCUUCACCGUUU    |
| siSYVN1#3 (siHRD1#3)    | D-007090-03              | GGAGAUGCCUGAGGAUGGA    |
| siSYVN1#4 (siHRD1#4)    | D-007090-04              | CCAAGAGACUGCCCUGCAA    |
| siMARCH6#1              | D-006925-01              | GAAGACAUAUGUAGAGUGU    |
| siMARCH6#2              | D-006925-02              | UCAUAGAUCUCGUCGCUUA    |
| siMARCH6#3              | D-006925-03              | GAAUUGGAAUGCUUUAGAA    |
| siMARCH6#4              | D-006925-04              | GAGCUUACAUGGGAAAGAA    |
| siRNF139#1 (siTRC8#1)   | D-006942-01              | GGGAAAAGCUUGACGAUUA    |
| siRNF139#2 (siTRC8#2)   | D-006942-02              | GAACUGUGCUUAAAAGUAA    |
| siRNF139#4 (siTRC8#4)   | D-006942-04              | GCACAUGUAUCGAAUUUAC    |
| siRNF139#17 (siTRC8#17) | D-006942-17              | AUAAUUAGUGGGUGCGAUU    |
| siRNF170#1              | D-007078-01              | GAAACUGGAUGAUGAUUCA    |
| siRNF170#2              | D-007078-02              | GGGCAACCCAGAUCUAUUA    |
| siRNF170#3              | D-007078-03              | GGCCAAAUAUCAAGGUGAA    |
| siRNF170#4              | D-007078-04              | GAGAUUGCAUCAGGAUUAU    |

|                     |             |                      |
|---------------------|-------------|----------------------|
| siAMFR#1 (siGP78#1) | D-006522-01 | GCAAGGAUCGAUUUGAAUA  |
| siAMFR#2 (siGP78#2) | D-006522-02 | GGAGCUGGCUGUCAACAAU  |
| siAMFR#3 (siGP78#3) | D-006522-03 | GAGGACUGCUC AUGUGAUU |
| siAMFR#4 (siGP78#4) | D-006522-04 | CGAGCUGGCUGCCGAGUUU  |
| siVCP#5             | D-008727-05 | GUAAUCUCUUCGAGGUAUA  |
| siVCP#6             | D-008727-06 | AAACAGAUCCUAGCCCUUA  |
| siVCP#7             | D-008727-07 | GAGAGCAACCUUCGUAAG   |
| siVCP#8             | D-008727-08 | GCACAGGUGGCAGUGUAUA  |

## APPENDIX FIGURE LEGENDS

### Appendix Figure S1

(A) *In situ* RNA hybridization and immunohistochemistry of Evi was performed on sequential FFPE slides of healthy colon and matched colon cancer tissue of 5 patients. One representative example for 3 patients is shown. Scale bar: 40  $\mu$ m. (B) Reduced signal of Evi mRNA in HEK293T cells after Evi knockdown confirmed specificity of Evi probes, which were used for *in situ* RNA hybridization. Scale bar: 100  $\mu$ m. (A, B) Probes directed against PolR2A and DapB were used as positive and negative controls respectively.

### Appendix Figure S2

Clonal Evi<sup>KO</sup> HEK293T cells were generated *via* CRISPR/Cas9 using sgRNA #2 targeting the 3<sup>rd</sup> Exon (Evi<sup>KO2.9</sup>) or sgRNA #1 targeting the Exon 2- Intron 2 intersection of Evi (Evi<sup>KO1.1</sup>). Single cell clones were analyzed by targeted amplicon sequencing. sgRNA target sequences are underlined in the wild-type (wt) sequences and PAM sequences are shown in red. Short lines indicate the count of deletions, which are shown on the right. A blue character specifies an insertion.

### Appendix Figure S3

Clonal Porcn<sup>KO</sup> HEK293T cells were generated using sgRNA #1 targeting the 2<sup>nd</sup> Exon of Porcn. Single cell clones were analyzed by targeted amplicon sequencing. sgRNA target sequences are underlined in the wild-type (wt) sequences and PAM sequences are shown in red. Short lines indicate the count of deletions, which are shown on the right. A blue character specifies an insertion. Single cell clones were analyzed by targeted amplicon sequencing. sgRNA target sequences are underlined in the wild-type (wt) sequences and PAM sequences are shown in red. Short lines indicate the count of deletions, which are shown on the right. A blue character specifies an insertion.

### Appendix Figure S4

(A, B) 24 hours after reverse transfection with Ctrl siRNA or pooled siRNAs against VCP, UBE2J2 or CGRRF1, HEK293T cells were transfected with Wnt3A expression plasmids. Using Blue Sepharose, secreted Wnt proteins were precipitated from conditioned medium 24 hours after plasmid transfection. Western blot quantification of secreted Wnt3A relative to HSC70 and relative to the input Wnt3A (divided by  $\beta$ -actin level) (means  $\pm$  sem, (A) n = 3, (B) n = 6).

## APPENDIX TABLE LEGENDS

### Appendix Table S1: Oligonucleotide sequences.

qRT-PCR primer of the indicated oligonucleotide sequences were used with the indicated probes for quantitative PCR applying the Universal Probe Library system. Sequences for guide RNAs were determined using E-CRISP (Heigwer *et al*, 2014). For amplicon sequences, primers of the indicated sequences were used for the 1<sup>st</sup> and 2<sup>nd</sup> PCR. Adapter sequences are shown in blue, gene-specific sequences in red and the characters illustrating library specific barcodes in green.

### Appendix Table S2: siRNA identifier.

The indicated siRNAs were purchased from Dharmacon and used either as single siRNA or as a pool of four siRNAs targeting the same mRNA.
