# Supplementary material for: ERAD‐dependent control of the Wnt secretory factor Evi
Source: PubMed Central journal article supplement (PMC5813261; doi:10.15252/embj.201797311), 2018-01-29

**Fig1 B**

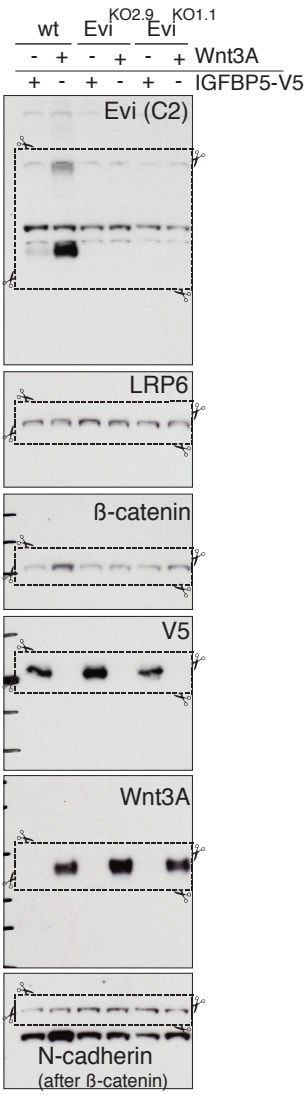

**Fig1 C**

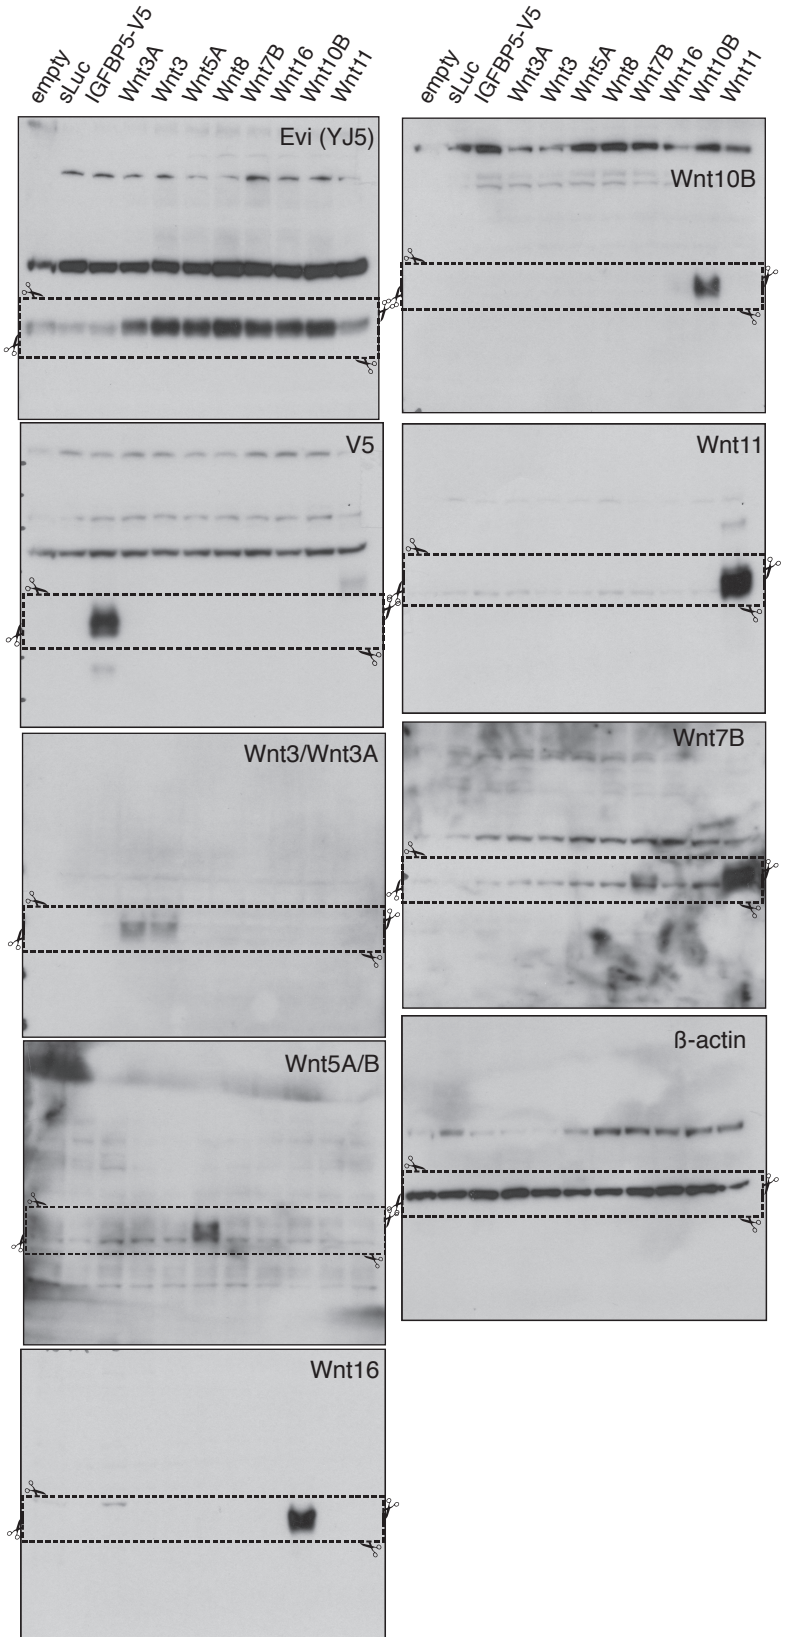

Fig1D

| empty | IGFBP5-V5 | Dvl2-HA | Wnt3A | 8 | 24 | 48 | - | - | - | rec. W3A (h) |                |
|-------|-----------|---------|-------|---|----|----|---|---|---|--------------|----------------|
| -     | -         | -       | -     | - | -  | -  | - | - | - | 24           | DMSO (h)       |
| -     | -         | -       | -     | - | -  | -  | - | - | - | 8            | 24SB216763 (h) |

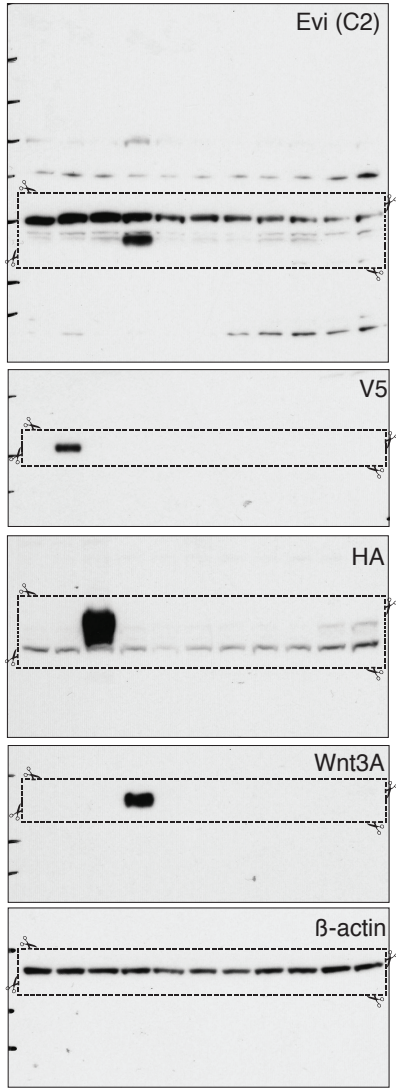

Supplement: EMBJ-37-e97311-s003.pdf [file EMBJ-37-e97311-s003.pdf]
