# Supplementary material for: ERAD‐dependent control of the Wnt secretory factor Evi
Source: PubMed Central journal article supplement (PMC5813261; doi:10.15252/embj.201797311), 2018-01-29

Fig2 B

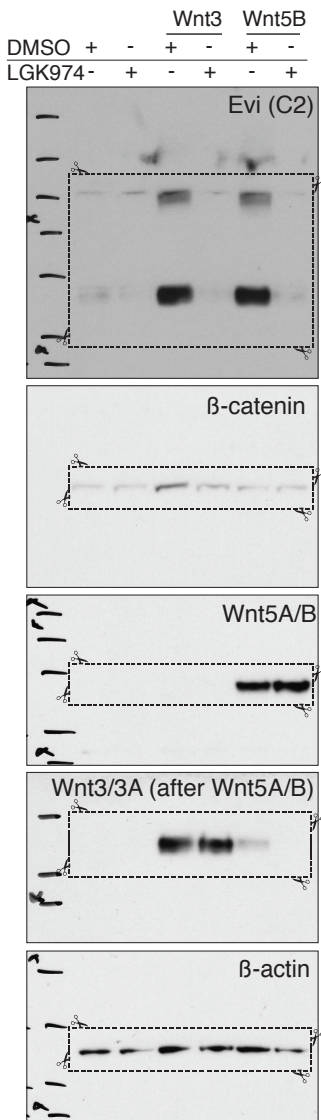

Fig2 C

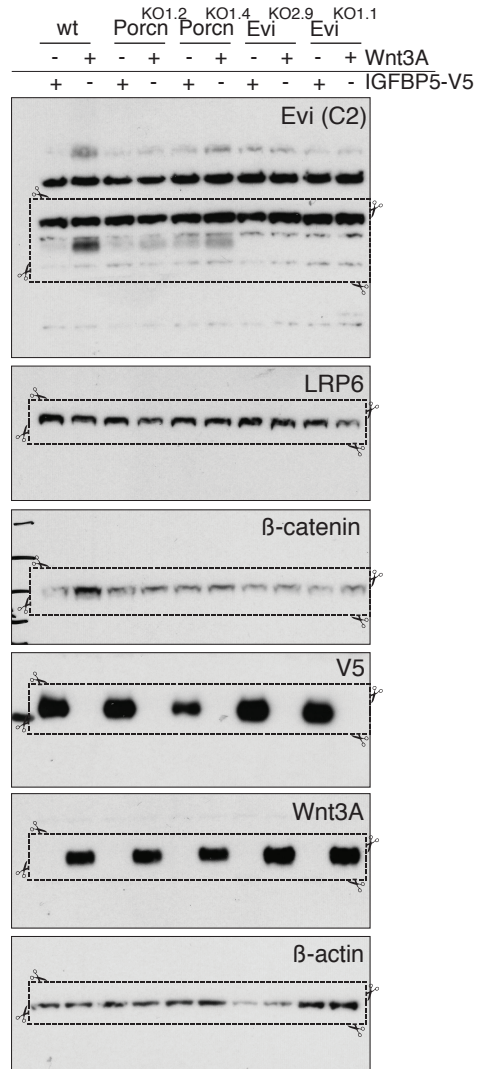

Fig2 D

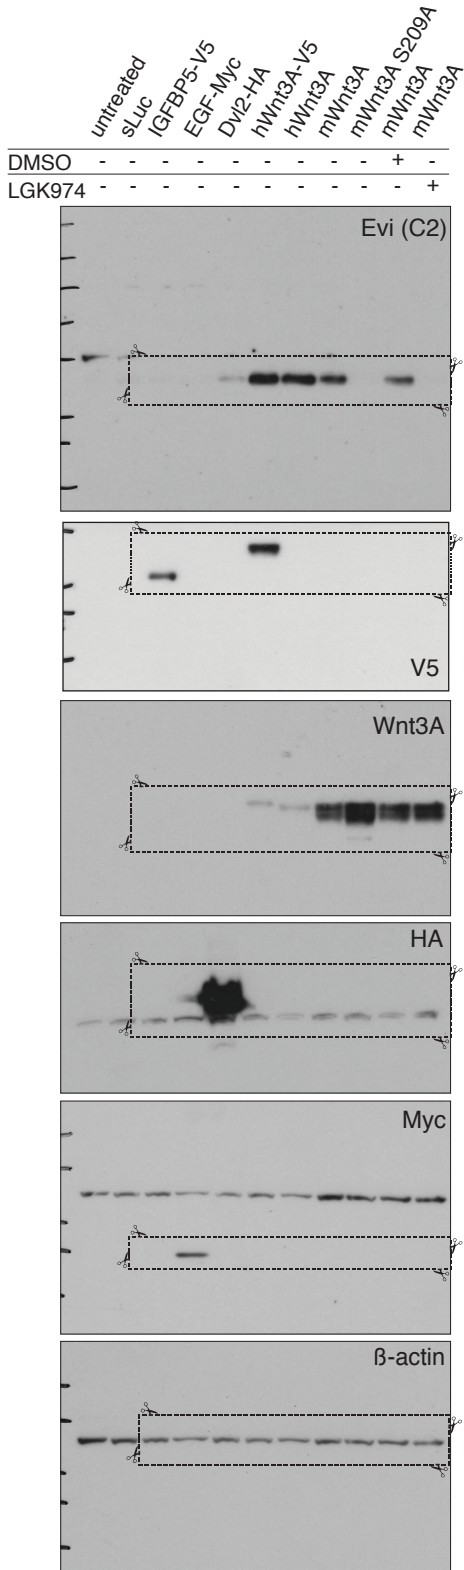

Fig2 E

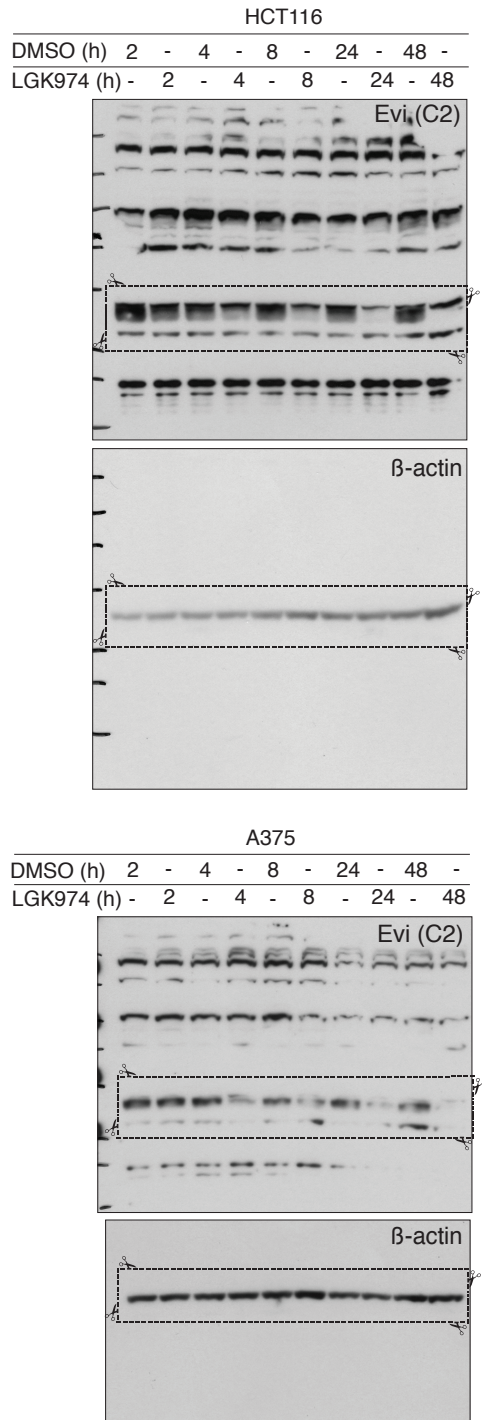

Supplement: EMBJ-37-e97311-s004.pdf [file EMBJ-37-e97311-s004.pdf]
