# Supplementary material for: ERAD‐dependent control of the Wnt secretory factor Evi
Source: PubMed Central journal article supplement (PMC5813261; doi:10.15252/embj.201797311), 2018-01-29

Fig3 A

|                  |   |   |   |   |   |   |   |   |
|------------------|---|---|---|---|---|---|---|---|
| Wnt3A            | - | + | - | + | - | + | - | + |
| IGFBP5-V5        | + | - | + | - | + | - | + | - |
| DMSO             | + | + | - | - | - | - | - | - |
| MG132 ( $\mu$ M) | - | - | 1 | 1 | 2 | 2 | 5 | 5 |

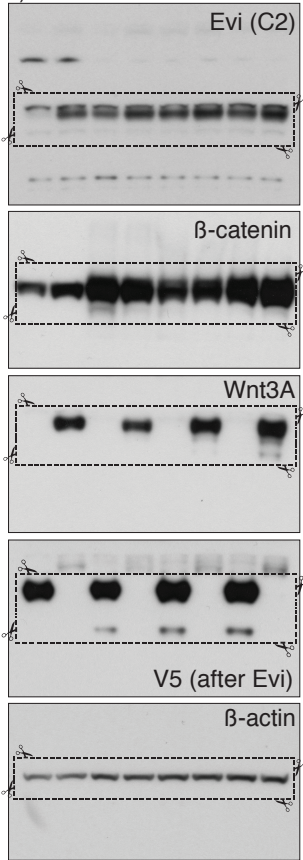

Fig3 B TUBE

|                      |   |   |   |       |   |   |   |
|----------------------|---|---|---|-------|---|---|---|
|                      |   |   |   | Ctrl  |   |   |   |
| empty                | + | - | + | beads |   | + | + |
| Wnt3                 | - | + | - | +     | + | - | - |
| Evi <sup>KO2.9</sup> | - | - | - | -     | - | + | - |
| DMSO                 | + | + | - | -     | - | - | - |
| 1 $\mu$ M MG132      | - | + | + | +     | + | + | - |
| siCtrl               | - | - | - | -     | - | - | + |
| siVCP                | - | - | - | -     | - | - | + |

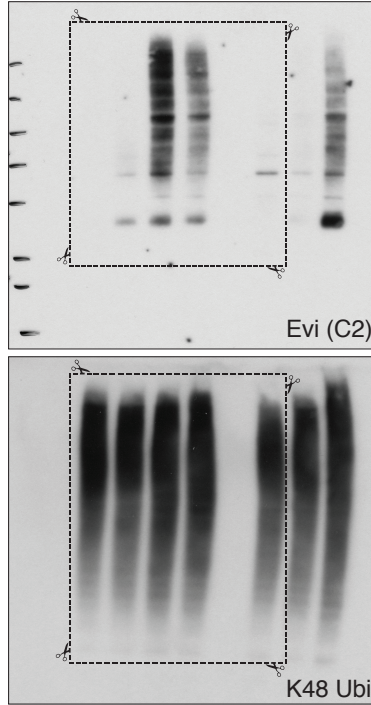

Fig3 B Input

|                      |   |   |   |       |   |   |   |
|----------------------|---|---|---|-------|---|---|---|
|                      |   |   |   | Ctrl  |   |   |   |
| empty                | + | - | + | beads |   | + | + |
| Wnt3                 | - | + | - | +     | + | - | - |
| Evi <sup>KO2.9</sup> | - | - | - | -     | - | + | - |
| DMSO                 | + | + | - | -     | - | - | - |
| 1 $\mu$ M MG132      | - | + | + | +     | + | + | - |
| siCtrl               | - | - | - | -     | - | - | + |
| siVCP                | - | - | - | -     | - | - | + |

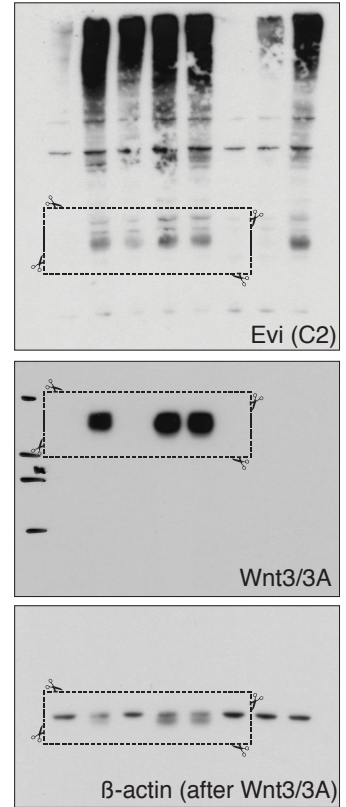

Fig3 D

|        | empty | IGFBP5-V5 | Dvl2-HA | Dvl3 | $\beta$ -Catenin-YFP | Wnt3A | Wnt3A-KDEL | Wnt3A-KDEL | Wnt3A-KDEL | Wnt3A-GFP |
|--------|-------|-----------|---------|------|----------------------|-------|------------|------------|------------|-----------|
| DMSO   | -     | -         | -       | -    | -                    | -     | -          | +          | -          | -         |
| LGK974 | -     | -         | -       | -    | -                    | -     | -          | -          | +          | -         |

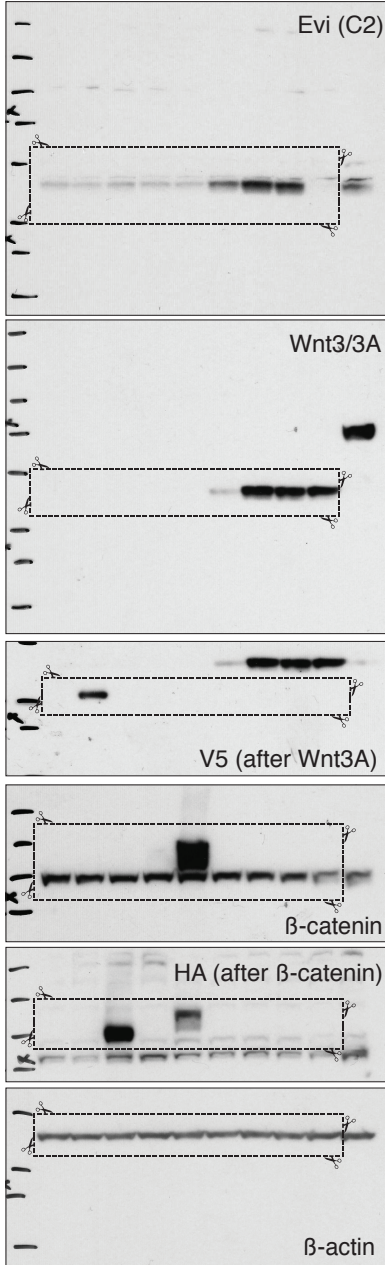

Supplement: EMBJ-37-e97311-s005.pdf [file EMBJ-37-e97311-s005.pdf]
