# Supplementary material for: ERAD‐dependent control of the Wnt secretory factor Evi
Source: PubMed Central journal article supplement (PMC5813261; doi:10.15252/embj.201797311), 2018-01-29

Fig4 B

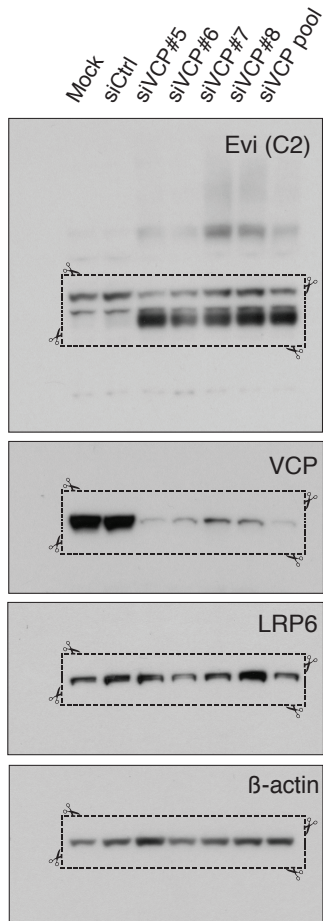

Fig4 C

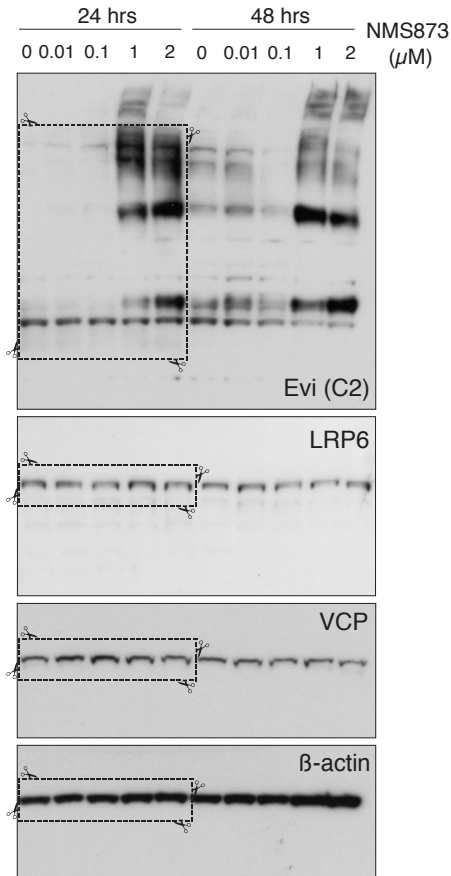

Fig4 D

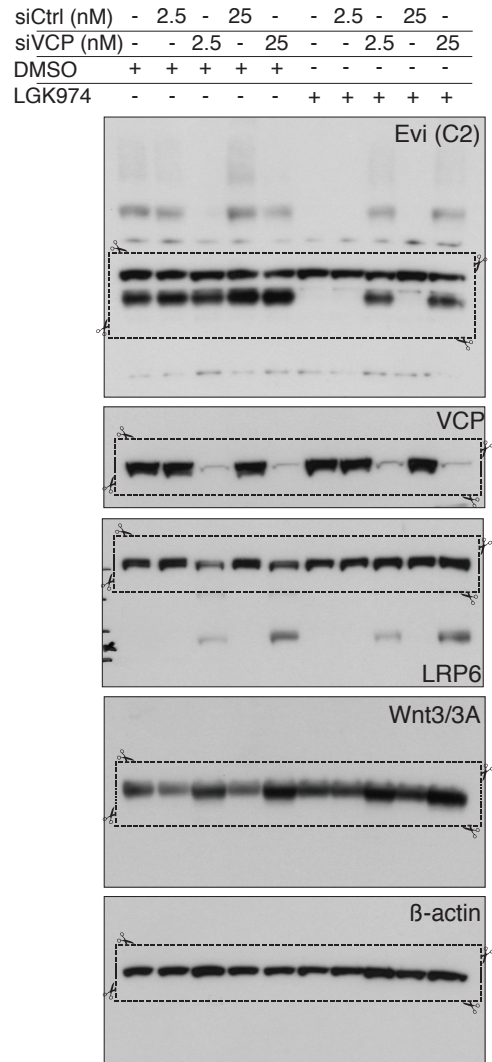

Fig4 E

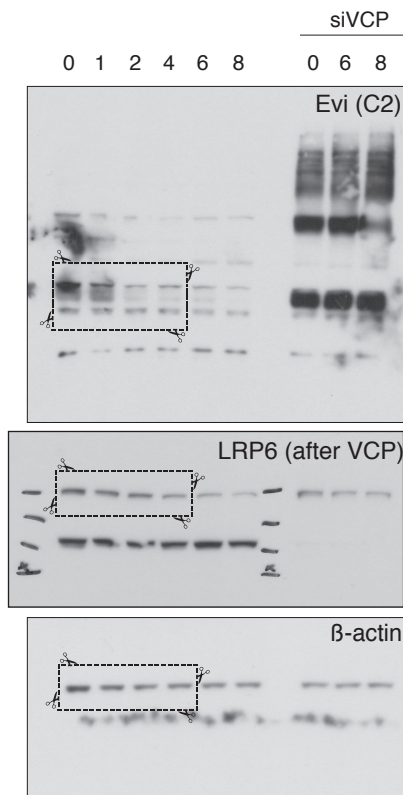

Fig4 E

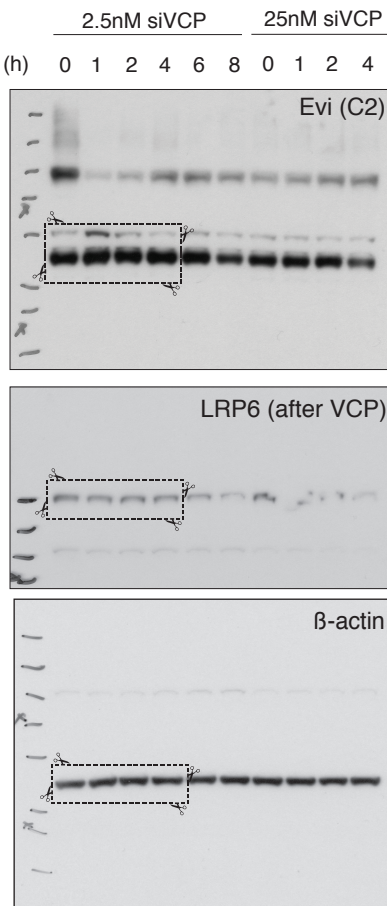

Fig4 F

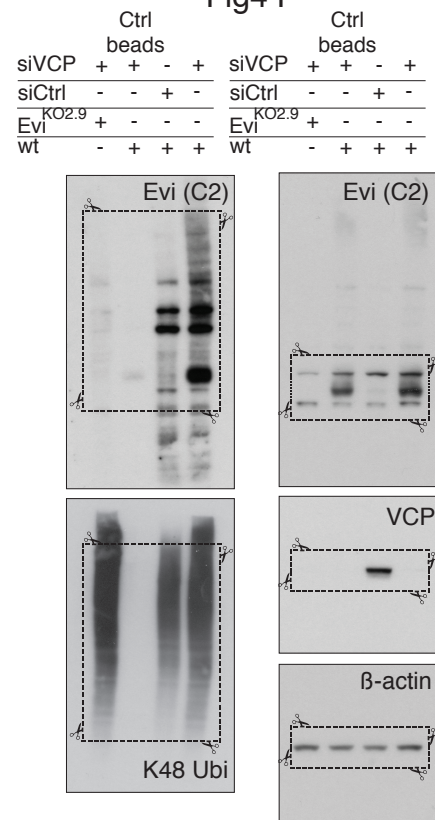

Supplement: EMBJ-37-e97311-s006.pdf [file EMBJ-37-e97311-s006.pdf]
