# Supplementary material for: ERAD‐dependent control of the Wnt secretory factor Evi
Source: PubMed Central journal article supplement (PMC5813261; doi:10.15252/embj.201797311), 2018-01-29

Fig6 B

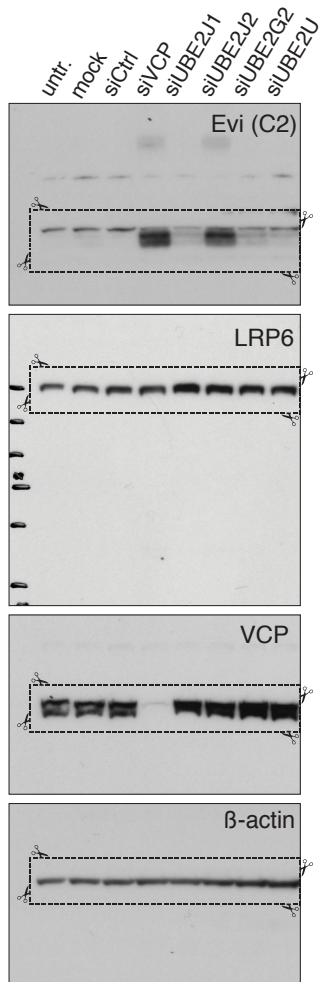

Fig6 C

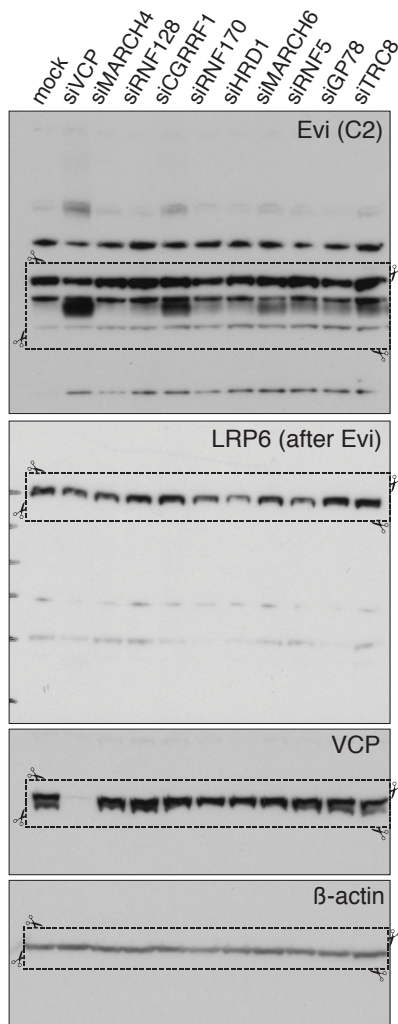

Fig6 D

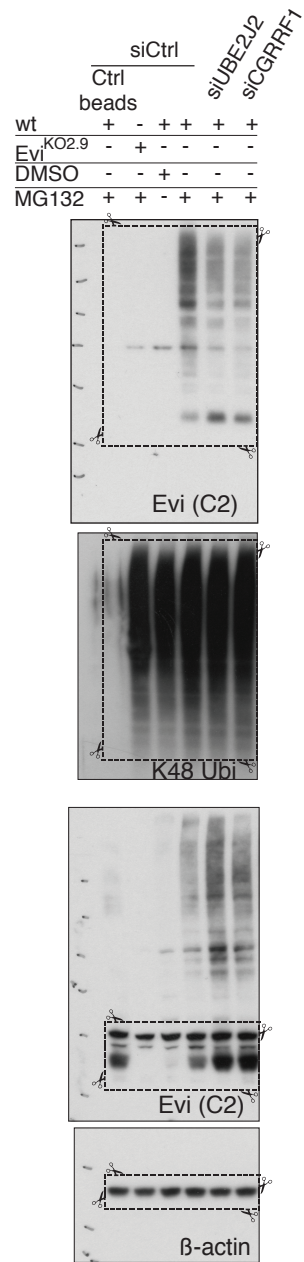

Fig6 E

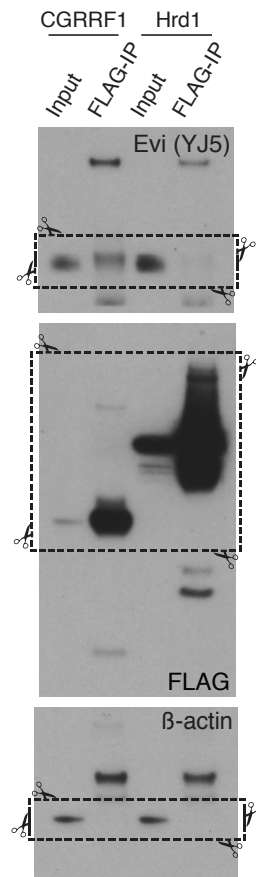

Supplement: EMBJ-37-e97311-s008.pdf [file EMBJ-37-e97311-s008.pdf]
