# Supplementary material for: ERAD‐dependent control of the Wnt secretory factor Evi
Source: PubMed Central journal article supplement (PMC5813261; doi:10.15252/embj.201797311), 2018-01-29

Fig7 A

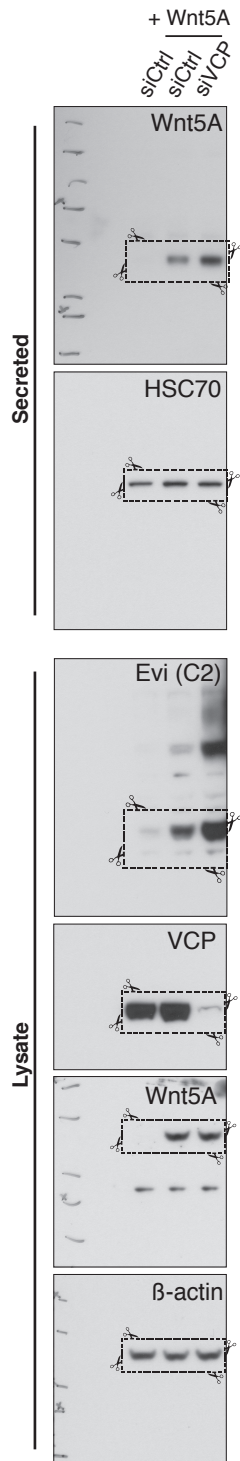

Fig7 B

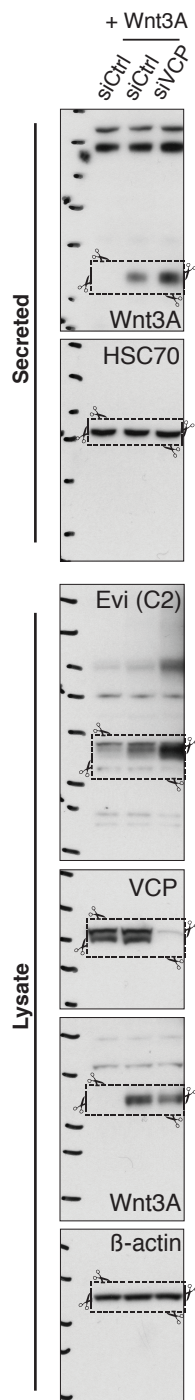

Fig7 C

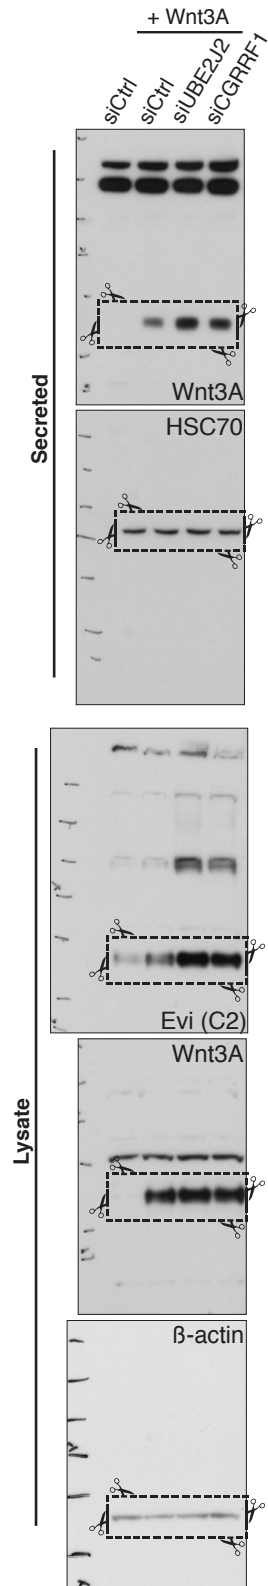

Supplement: EMBJ-37-e97311-s009.pdf [file EMBJ-37-e97311-s009.pdf]
